29 **ABSTRACT**

30 The gram-negative bacterium *Coxiella burnetii* is the causative agent of Query (Q) fever in  
31 humans and coxiellosis in livestock. Association between host genetic background and *Coxiella*  
32 *burnetii* pathogenesis has been demonstrated both in humans and animals; however, specific  
33 genes associated with severity of infection remain unknown. We employed the *Drosophila*  
34 Genetics Reference Panel to perform a genome-wide association study and identify host genetic  
35 variants that affect *Coxiella burnetii* infection outcome. The analysis resulted in 64 genome-wide  
36 suggestive ( $P < 10^{-5}$ ) single nucleotide polymorphisms or gene variants in 25 unique genes. We  
37 examined the role of each gene in *Coxiella burnetii* infection using flies carrying a null mutation  
38 or RNAi knockdown of each gene and monitoring survival. Of the 25 candidate genes, 15  
39 validated using at least one method. For many, this is the first report establishing involvement of  
40 these genes or their homologs with *Coxiella burnetii* susceptibility in any system. Among the  
41 validated genes, *FER* and *tara* play roles in the JAK-STAT, JNK, and decapentaplegic/TGF- $\beta$   
42 signaling pathways that are associated with the innate immune response to *Coxiella burnetii*  
43 infection. Two other two validated genes, *CG42673* and *DIP- $\epsilon$* , play roles in bacterial infection  
44 and synaptic signaling but no previous association with *Coxiella burnetii* pathogenesis.  
45 Furthermore, since the mammalian ortholog of *CG13404* (*PLGRKT*) is an important regulator of  
46 macrophage function, *CG13404* could play a role in *Coxiella burnetii* susceptibility through  
47 hemocyte regulation. These insights provide a foundation for further investigation of genetics of  
48 *Coxiella burnetii* susceptibility across a wide variety of hosts.

49

50

## 51 INTRODUCTION

52 *Coxiella burnetii* is the causative agent of Q fever, a zoonotic disease that poses a serious  
53 threat to both human and animal health (Maurin and Raoult, 1999). Based on morbidity, low  
54 infectious dose and the environmental stability of the organism, *C. burnetii* is classified as a  
55 Category B priority pathogen by the United States NIH and CDC (Madariaga et al., 2003). It is  
56 well known that the epidemiology of Q fever is associated with the presence of infected animals;  
57 sheep, goats, cattle, and humans primarily become infected by inhalation of contaminated  
58 aerosols (Marrie et al., 1996; McQuiston et al., 2002; Schimmer et al., 2008). Therefore,  
59 reducing bacterial load in the livestock is critical to preventing Q fever outbreaks. *C. burnetii* is  
60 endemic worldwide and sporadic outbreaks have recently been reported in the United States  
61 (Anderson et al., 2013; Dahlgren et al., 2015; Karakousis et al., 2006; Kersh et al., 2013;  
62 Sondgeroth et al., 2013). A recent large outbreak of Q Fever that originated in a goat farm in the  
63 Netherlands provides a warning of the risks associated with *C. burnetii* infection where 307  
64 million Euros were spent in public health management efforts and agricultural interventions  
65 (Roest et al., 2011a, 2011b; Schimmer et al., 2008; van Asseldonk et al., 2013). To date, no  
66 commercial Q fever vaccine is available for humans or animals in the United States, and  
67 antibiotic therapy is the only option for treating the infection in humans. Culling infected or at-  
68 risk animals has been a strategy to contain emerging outbreaks (Roest et al., 2013, 2011b, 2012).  
69 Additionally, the lack of animal models with genetic malleability and the strict requirements for  
70 BSL3 animal facilities for work with Select Agent phase I virulent strains of *C. burnetii* make it  
71 difficult to study host-pathogen interactions *in vivo*.

72 The host genetic background has been shown to influence the development of *C. burnetii*  
73 infection in both humans and other animals (De Lange et al., 2014; Delaby et al., 2012; Ghigo et

74 al., 2002; Leone et al., 2004; Meghari et al., 2008; Raoult et al., 2005). Experimental studies in  
75 human and mouse cells have correlated defective monocyte/macrophage activation and  
76 migration with ineffective granuloma formation and overexpression of IL-10 observed in  
77 patients with chronic Q fever (Bewley, 2013; Delaby et al., 2012; Ka et al., 2014; Meghari et al.,  
78 2008; Mehraj et al., 2013). Two recent studies performed genotyping in human population and  
79 revealed that genetic variation in innate immune genes, such as pattern recognition receptors and  
80 *IFNG*, are associated with susceptibility to Q fever (Ammerdorffer et al., 2016; Wielders et al.,  
81 2015). Despite this importance, additional unidentified factors and specific genetic variants  
82 associated with susceptibility to the infection remain largely unknown. In addition, it remains to  
83 be elucidated how host genetic factors affect bacterial load and shedding in susceptible reservoir  
84 hosts.

85 Previous studies have profiled mammalian host responses to *C. burnetii* infection and  
86 show that the bacteria down-regulate the host innate immune response during acute infection and  
87 that the resolution of Q fever is associated with the re-establishment of type I interferon signaling  
88 (Faugaret et al., 2014; Ghigo et al., 2002; Gorvel et al., 2014). However, the mechanisms by  
89 which *C. burnetii* targets the host innate immune pathways and the host genes that contribute to  
90 the block in innate immune activation remain largely unknown. Directed studies in humans have  
91 revealed that single-nucleotide polymorphisms (SNPs) in innate immune receptors and signaling  
92 genes such as *TLR1*, *STAT1*, *IFNG*, and *MyD88* are associated with acute or chronic Q fever  
93 (Schoffelen et al., 2015; Wielders et al., 2015). Since these studies used a targeted approach to  
94 examine SNPs in only a set of candidate genes, we aim to undertake a global, genome-wide  
95 analysis to identify gene variants associated with *C. burnetii* infection using *Drosophila*  
96 *melanogaster* as the host model.

97           We recently demonstrated that adult *D. melanogaster* flies are susceptible to infection  
98   with the BSL2 NMII clone 4 strain of *C. burnetii* and that this strain is able to replicate in this  
99   host (Bastos et al., 2017). Additionally, *D. melanogaster* lacking functional copies of the gram-  
100   negative bacteria sensing immune deficiency pathway (Imd) signaling genes, *PGRP-LC* and  
101   *Relish*, displayed increased susceptibility to *C. burnetii* infection. Indeed, the *D. melanogaster*  
102   model is suitable for studying host-pathogen interactions during *C. burnetii* infection.  
103   Importantly, the recently developed *Drosophila* genetics reference panel (DGRP), a fully  
104   sequenced, inbred panel of fly lines derived from a natural population, provides an efficient  
105   platform for genotype-to-phenotype associations via a genome-wide association study (Huang et  
106   al., 2014a; Mackay et al., 2012a). The DGRP has already been used to reveal genes associated  
107   with resistance/tolerance to other bacterial pathogens (Bou Sleiman et al., 2015; Howick and  
108   Lazzaro, 2017; Wang et al., 2017).

109           In this study, we identified genetic variants in *D. melanogaster* that were associated with  
110   susceptibility or tolerance to *C. burnetii* infection. Specifically, we obtained a list of 64 SNPs in  
111   25 unique genes from the different GWA performed. Our analyses revealed genes with sex-  
112   specific effects on susceptibility and tolerance that have functions associated with actin binding,  
113   transcriptional response, and regulation of G-proteins. Multiple genes within the decapentaplegic  
114   (DPP) pathway, homologous to the TGF- $\beta$  pathway in mammals (Gelbart, 1989), were  
115   associated with susceptibility to infection. Rho GEFs and TGF- $\beta$  have been associated with the  
116   development of the *Coxiella*-containing vacuole (CCV) and pathogenesis in humans,  
117   respectively (Aguilera et al., 2009; Benoit et al., 2008c, 2008a; Pennings et al., 2015; Salinas et  
118   al., 2015; Weber et al., 2016). Importantly, all the candidate genes identified have mammalian

119 orthologs or highly conserved functions that will allow for extrapolation of the findings here to  
120 mammalian systems.

121         Of the 25 candidate genes identified, 15 genes significantly affected host survival during  
122 *C. burnetii* infection in *D. melanogaster* null mutants or RNAi knockdown flies. While other  
123 DGRP studies tend to use either null mutants or RNAi knockdown flies for validation studies, we  
124 used both gene disruption methods to test how the genes affect diseases severity. We also  
125 examined the effect of candidate SNPs using regulatory element analysis (modENCODE) and  
126 found some within transcription factor binding hot spots, putative enhancers, novel splicing,  
127 branch point variation, and codon usage variation that could explain how the variants may affect  
128 host gene expression ultimately altering the ability to fight infection. We show how the DGRP  
129 can be utilized to identify host genetic variants associated with sex-specific susceptibility or  
130 tolerance to *C. burnetii* infection, and have broad cross-species applications.

## 131 MATERIAL AND METHODS

132 ***Drosophila melanogaster* and *C. burnetii* stocks.** Fly stocks were obtained from the  
133 Bloomington *Drosophila* Stock Center, the Vienna *Drosophila* Resource Center, Exelixis at  
134 Harvard Medical School and the Kyoto Stock Center. Fly stocks were maintained at room  
135 temperature in standard meal agar fly food at 25°C and 65% humidity. All fly strains used are  
136 listed in **Table S1**. *C. burnetii* Nine Mile phase II (NMII) clone 4 RSA439 was propagated in  
137 Acidified Citrate Cysteine Medium 2 as previously described (Omsland et al., 2009). *C. burnetii*  
138 stocks were quantified by measuring bacterial genome equivalent (GE) using quantitative real-  
139 time PCR (qPCR) as previously described (Coleman et al., 2004).

140 **Fly infections and hazard ratio phenotype determination.** Groups of 40 male and  
141 female adult flies (two to seven days old) from each DGRP line used in this study (**Table S2 and**  
142 **S3**) were injected with phosphate buffered-saline (PBS) or 10<sup>5</sup> genome equivalents (GE) of *C.*  
143 *burnetii* diluted in PBS to establish infection. For injections, flies were anesthetized with CO<sub>2</sub>  
144 and injected with 23 nL of bacteria or PBS using a pulled glass capillary and an automatic  
145 nanoliter injector (Drummond Scientific, Broomall, PA). Individual flies were injected at the  
146 ventrolateral surface of the fly thorax and placed into new vials. After injection, mortality was  
147 monitored daily for 30 days with the flies maintained at 25°C and 68% humidity. Survival curves  
148 were analyzed by the log-rank (Mantel-Cox) test using GraphPad Prism (GraphPad Software,  
149 Inc.) to determine a hazard ratio for males and females for each DGRP line. Any line having less  
150 than three percent mortality in the mock-infected group was not included in downstream  
151 analyses.

152 **Genome-wide association analyses using hazard ratios.** Phenotype to genotype  
153 association was performed by submitting log<sub>10</sub> transformed hazard ratios to the dgrp2 webtool

154 (<http://dgrp2.gnets.ncsu.edu/>), which adjusts the phenotype for the effects of *Wolbachia* infection  
155 and major inversions (Huang et al., 2014b; Mackay et al., 2012b). Three separate analyses were  
156 run using male, female, and combined hazard ratios for the DGRP lines used in this study (**Table**  
157 **S2-S4**). R was used to create QQ plots from log-transformed hazard ratios and obtain  $R^2$  values  
158 and genomic inflation values ( $\lambda$ ). For male and female analyses, 193 male and 195 female log-  
159 transformed hazard ratios were submitted (**Table S2 and Table S3**, respectively). SNPs and  
160 small indel variants with a P-value (mixed effects model) below  $10^{-5}$  were considered genome-  
161 wide suggestive candidate SNPs and further analyzed. For the combined analysis, both male and  
162 female hazard ratios were submitted for 191 DGRP lines. Candidate SNPs with P-values (mixed  
163 effects model) less than  $10^{-5}$  for the average trait or the difference (female – male) trait were  
164 selected for further study. The DGRP genome assembly (BDGP R5/dm3) was used to identify  
165 variants in candidate genes. Human orthologs of candidate genes were identified by using the  
166 DRSC Integrative Ortholog Prediction Tool (DIOPT) and the ortholog with the highest weighted  
167 score was reported (Hu et al., 2011a). Predicted functions for each candidate gene were gathered  
168 using Flybase (FB2019\_02). Regulatory annotation summaries for each SNP and indel were  
169 compiled using Flybase (FB2019\_02) and modENCODE utilizing variant coordinates converted  
170 to the BDGP R6/dm6 reference assembly. Regulatory annotations were expounded by reviewing  
171 publicly available data within modENCODE tracks, all noncoding features including  
172 transcription factor binding sites, histone ChIP-seq data, chromatin domain segmentation, and  
173 small RNA-seq tracks.

174 **Validation of candidate genes.** Two replicates of forty adult flies from each null mutant  
175 and RNAi knockdown for each candidate gene were injected with PBS or *C. burnetii*, as stated  
176 previously, to empirically determine the effect of knockout or knockdown of the candidate gene



177 on severity to infection. All experiments were conducted twice independently, and the results  
178 were combined to determine hazard ratios and generate mortality graphs. RNAi knockdown was  
179 performed using straight-winged progeny from crosses between the CyO-balanced *Act5C-GAL4*  
180 driver line and the corresponding dsRNA-containing RNAi lines (**Table S1**). Sibling progeny  
181 flies carrying the CyO balancer were used as control flies. Genetic background strains for each  
182 null mutant strain were used as control flies. After injection, adult flies were maintained at 25°C  
183 and 68% humidity for 30 days and mortality was monitored daily. Hazard ratios were determined  
184 from the survival curves of two combined mortality experiments and analyzed as stated  
185 previously. In addition, we employed a strict threshold of  $P < 0.01$  to determine significant  
186 change from control genotype as summarized in **Table S5-6**.

187 **Splicing, branch point variation, and codon usage analysis.** The Ensembl project  
188 (<http://uswest.ensembl.org/index.html>) and The Human Splicing Finder  
189 (<http://www.umd.be/HSF/>) were used to determine splicing and branch point variation from  
190 curated sequences to determine codon usage fraction based on frequency of amino acids per  
191 thousand.

192 **Data availability.** Strains and stocks are available upon request. Genomic sequence for  
193 the DGRP is available at <http://dgrp.gnets.ncsu.edu/>. Supplemental material is available at  
194 FigShare. The authors affirm that all data necessary for confirming the conclusions of the article  
195 are present within the article, figures, and tables.

196

197 **RESULTS**

198 **Susceptibility to *C. burnetii* infection is dependent on host genetic background.**

199 Previously, we determined that flies deficient in the IMD signaling pathway genes, *PGRP-LC*  
200 and *Relish*, exhibited increased susceptibility to *C. burnetii* infection (30). We also determined  
201 that the gene *eiger* contributed to decreased tolerance to *C. burnetii* infection in flies, and *eiger*  
202 mutant flies were less susceptible to *C. burnetii* infection (Bastos et al., 2017). Therefore, we  
203 hypothesized that susceptibility to *C. burnetii* infection in *Drosophila* was associated with host  
204 genetic background, and that the broad base genetic variation in the DGRP would help identify  
205 other candidate genes that effect susceptibility to *C. burnetii* infection via GWA analysis. To  
206 determine the susceptibility of each DGRP line to *C. burnetii* infection, adult males and females  
207 of each line were mock-infected or infected with *C. burnetii*. Hazard ratios were calculated using  
208 the survival curves for male and female flies and subsequently used as input for the GWA  
209 analysis (**Figure 1**). In total, 193 and 195 hazard ratios were calculated for males and females,  
210 respectively. The survival curves revealed an approximately log normal distribution of hazard  
211 ratios ranging from -0.719 to 1.643 for male flies (0.191 to 44.01, non-log-transformed) and -  
212 0.714 to 1.200 for female flies (0.1932 to 15.85, non-log-transformed) (**Table S2 and S3, Figure**  
213 **S1A**), which indicates that genetic polymorphisms in the DGRP lines affect susceptibility to *C.*  
214 *burnetii* infection. Interestingly, male flies were more susceptible than female flies overall to *C.*  
215 *burnetii* infection, with a mean hazard ratio of 1.90 for male flies and 1.56 for female flies ( $P =$   
216 0.0015) (**Figure S1A**). Notably, we observed three distinct susceptibility phenotypes for both  
217 male and female flies. Most DGRP lines were susceptible or resistant to *C. burnetii* infection,  
218 characterized by increased mortality in the *C. burnetii* group or similar mortality in the *C.*  
219 *burnetii* and mock-infected group, respectively. However, some lines exhibited decreased

220 mortality compared to the mock-infected group. Mutualistic traits maintained through the  
221 evolution of *C. burnetii* may act synergistically with specific genotypes in the DGRP lines to  
222 yield a symbiotic phenotype.

223 **GWA analyses of DGRP hazard ratios reveals candidate SNPs.** The DGRP facilitates  
224 rapid genome-wide association analyses using a quantitative phenotype via submission of a data  
225 set to the online webtool (Mackay et al., 2012a). To determine polymorphisms in the DGRP  
226 population that affect susceptibility to *C. burnetii*, the hazard ratios were submitted for analysis.  
227 However, due to genome-wide association analyses relying on parametric tests, the hazard ratios  
228 were log transformed to yield an approximately normal distribution (Shapiro-Wilke test,  $P > 0.1$ )  
229 prior to submission for GWA analysis (**Figure S1A**). Additionally, it was determined that hazard  
230 ratios were significantly positively correlated between male and female flies ( $P = 4.99 \times 10^{-7}$ ),  
231 but with an  $r^2$  value of 0.121, which indicates a weak correlation and potential sex-dependent  
232 genotypes (**Figure S1B**). Thus, hazard ratios were submitted as separate files for male and  
233 female analyses, and a single, combined file in order to identify polymorphisms that may be sex-  
234 dependent and to increase power for polymorphisms that are sex-independent. The sex-  
235 independent analysis which we termed average analysis, results in top hit SNPs that affect both  
236 sexes while the sex-dependent analysis which we termed difference analysis, results in top hits  
237 that affect one sex but not the other. A total of 193, 195, and 191 hazard ratios were submitted  
238 for males, females, and average and difference, respectively (**Table S2-S4**).

239 A total of 1,893,791 polymorphisms were tested in the male analysis, and 1,897,049  
240 polymorphisms were tested in the female analysis. The combined analysis tested a total of  
241 1,889,141 polymorphisms. In total, the GWA analyses yielded a total of 64 associated  
242 polymorphisms, of which 59 were unique polymorphisms, below the genome-wide suggestive P-

243 value threshold of  $10^{-5}$ , as expected for studies employing the DGRP (**Table S5**). In addition,  
244 quantile-quantile (Q-Q) plots revealed no significant inflation due to dataset distribution, and  
245 lambda values ranged from 0.993 (females) to 1.002 (difference) (**Figure S2A-D**). Lastly, P-  
246 values derived from these analyses appear to be reduced overall based on the lines from the Q-Q  
247 plots and lambda values below 1 (**Figure S2A-D**).

248       Of the 64 polymorphisms identified from the GWA, 14 SNPs are intergenic (21.9%),  
249 three of which are within 200 base pairs upstream of nearest gene; 39 are within introns (60.9%);  
250 eight are within exons (12.5%); one is within the 5' UTR (1.6%); and two are in antisense-  
251 coding RNA within exon/introns (3.1%) (**Table S5**). Of the eight SNPs within exons, six are  
252 silent and two are missense mutations. From the 64 top SNPs, we identified 25 unique candidate  
253 genes with available stocks for gene disruption and used the DGRP genome assembly (BDGP  
254 R5/dm3) to gather predictive functions and regulatory annotations for each gene using Flybase  
255 (FB2019\_02) and modENCODE (**Table 1**). For each candidate gene we also report the human  
256 ortholog with the highest weighted score from the DRSC Integrative Ortholog Prediction Tool  
257 (DIOPT).

258       We analyzed the chromatin state of all 25 candidate gene variants using Flybase and  
259 modENCODE and found that 12 are in transcription factor binding sites (TFBS) (48%); nine are  
260 within regions predicted to be transcriptionally silent (36%); one is within a long noncoding  
261 RNA (4%); and three are in enhancers only (12%) (**Table 1**). The SNP within the candidate gene  
262 *loco* lies within an antisense RNA that is also an enhancer and TFBS. Candidate gene functions  
263 were derived from available information on Flybase.

264       **Validation of candidate genes.** We next tested the 25 candidate genes from the different  
265 GWA (**Table 1**) by infecting and monitoring survival during *C. burnetii* infection for 30 days in

266 flies carrying a null mutation in the candidate gene or knocked down for the candidate gene by  
267 RNAi. We defined validation of candidate genes as any line that has significantly different  
268 mortality than the mock-infected and genetic control (**Tables S6 and S7**). Specifically, we  
269 employed a strict threshold of  $P < 0.01$  to determine significant change from control genotype.  
270 Of the 25 candidate genes, six validated in null mutants only (24%), five in RNAi knockdown  
271 only (20%), four in both null mutants and RNAi (16%), and 10 did not validate with either  
272 method (40%) (**Figure 3A**). Mortality of  $w^{1118}$  males and females (**Figure 3B-B'**) during *C.*  
273 *burnetii* infection were used as the genetic control for several null mutants, including  
274 *RhoGEF64C*<sup>MB04730</sup> (**Figure 3C**), *tara*<sup>1</sup> (**Figure 3D**), and *CG13404*<sup>07827b</sup> (**Figure 3E**). We  
275 selected these candidate genes to represent how validation was determined based on P-value and  
276 survival trend for validating genes from different categories, i.e. null-only, RNAi-only, or both.  
277  $w^{1118}$  females (**Figure 3B**) are not susceptible to *C. burnetii* infection ( $P = 0.033$ ) but  $w^{1118}$  males  
278 (**Figure 3B'**) are highly susceptible ( $P < 0.0001$ ) which corroborates our previous work (Bastos  
279 et al., 2017). The candidate gene *RhoGEF64C*<sup>MB04730</sup> was selected from male-only GWA (**Figure**  
280 **3C-C'**) and we observed that survival in null mutants (**Figure 3C**) was overall tolerant ( $P =$   
281  $0.0014$ ) compared to  $w^{1118}$  males (**Figure 3B'**). In contrast, there was no significant change in  
282 survival between control and RNAi genotypes (**Figure 3C'**) (control,  $P = 0.0374$ ; RNAi,  $P =$   
283  $0.0130$ ). Thus, *RhoGEF64C*<sup>MB04730</sup> males validated only in null mutants. The candidate gene *tara*  
284 was selected from the female-only GWA and we observed that in null mutants (**Figure 3D**) and  
285 RNAi knockdown flies (**Figure 3D'**), the absence of the gene resulted in increased mortality  
286 compared to control genotypes. Specifically, *tara*<sup>1</sup> females are susceptible to infection ( $P <$   
287  $0.0001$ ) compared to  $w^{1118}$  females (**Figure 3B**) and *tara* RNAi females (**Figure 3D'**) are also  
288 susceptible ( $P = 0.0025$ ) compared to control ( $P = 0.0123$ ). Thus, *tara* validated for females in

289 both null mutants and RNAi knockdown flies. The candidate gene *CG13404*<sup>f07827b</sup> was selected  
290 from female-only GWA and we observed that null mutants (**Figure 3E**) are not susceptible to  
291 infection ( $P = 0.2737$ ) like *w<sup>1118</sup>* females (**Figure 3B**). In contrast, *CG13404* RNAi females  
292 (**Figure 3E'**) are susceptible to infection ( $P < 0.0001$ ) while control genotype females are not  
293 ( $P=0.3914$ ). Thus, *CG13404* validated only in RNAi knockdown flies.

294 **ENCODE analysis of validated genes.** Splicing and branching of precursor mRNA and  
295 abundance of tRNA codons are known to affect gene expression (Jeacock et al., 2018; Komar,  
296 2016; Královičová et al., 2004; Sauna and Kimchi-Sarfaty, 2011; Singh and Cooper, 2012; Wang  
297 and Burge, 2008; Will and Luhrmann, 2011; Zhou et al., 2016). Therefore, we used data  
298 available from the ENCODE project to determine regulatory annotations for the SNPs in genes  
299 that validated in host survival experiments. **Table 2** summarizes the splicing and branch point  
300 analysis in terms of percent variation from wildtype and codon usage as a fraction of frequency  
301 of amino acid (SNP) per thousand over frequency of amino acid (wildtype) per thousand. Several  
302 SNPs varied at the predicted mRNA splicing sites, branch points, or codon usage compared to  
303 wildtype sequences such as the SNPs affecting the validated genes *CG34351*, *DIP-ε*, *Pura*, *tara*,  
304 *FER*, and *IP3K2*. Changes in condon usage fraction for *shn* and *CG13404* may affect these gene  
305 variants albeit to a lesser extent. Together, we use these results to hypothesize why gene variants  
306 may or not validate using null mutants and RNAi knockdown.  
307

## 308 **DISCUSSION**

309           Host genetics are known to lead to differences in human Q fever severity, and previous  
310 studies using human samples were focused on specific genes such as *IFNG*, *STAT1*, and *TLR10*  
311 (Ammerdorffer et al., 2016; Wielders et al., 2015). In this study, we performed an unbiased  
312 GWAS to uncover all possible genes that may regulate *C. burnetii* infection. Our study builds on  
313 previous literature by identifying host variants that not only affect *C. burnetii* infection outcome  
314 but can also be translated to future human studies due to conserved sequences. In addition to host  
315 variants, bioinformatic analysis of regulatory elements also reveals further possible explanations  
316 for host survival differences between genotypes. Altogether, the validated genes in this study  
317 reveal both novel connections and conserved cross-species connections like  
318 hemocytes/macrophage regulation and sex-specific susceptibility differences.

319           To perform the GWAS we infected *D. melanogaster* lines from the DGRP library, which  
320 have known genetic variation, with *C. burnetii* and measured host survival. We then used the  
321 hazard ratios from the survival curves as input for a genome-wide association to identify host  
322 variants affecting host survival. In the genetic screen alone, over 31,000 individual fruit flies  
323 were infected yet additional power of the DGRP screen lies on the previously genetically  
324 annotated 4,565,215 naturally occurring molecular variants, including 3,976,011 high quality  
325 single/multiple nucleotide polymorphisms (SNPs/MNPs), 125,788 polymorphic microsatellites,  
326 169,053 polymorphic insertions and 293,363 polymorphic deletions (relative to genome  
327 reference) (Mackay and Huang, 2018). Our screen revealed 64 genome-wide suggested  
328 polymorphisms, 0.0014% of the 4,565,215 total variants.

329           We then narrowed the 64 SNPs to 25 unique candidate genes to test host survival during  
330 *C. burnetii* infection based on fly stocks available for gene disruption using null mutants and

331 RNAi knockdown. We validated candidate genes using two rules; 1) That mutants (null or  
332 RNAi-knockdown) would have a statistically significant difference in survival compared to  
333 mock at a threshold of  $P < 0.0001$ , and 2) That the survival trend would differ from control  
334 genotype. Of the 25 candidate genes tested, 15 validated using either null mutants or RNAi  
335 knockdown. We did not expect that validating genes would phenotypically behave the same  
336 between null mutants and RNAi knockdown because the loss versus decreased levels of a gene  
337 may influence pathways in differently (Boettcher and McManus, 2015; Zimmer et al., 2019).  
338 Several *D. melanogaster* GWA studies use flies in which gene expression has been silenced  
339 using RNAi knockdown flies to validate candidate genes because controls for knockdown are  
340 obtained within sibling progeny of a cross (Howick and Lazzaro, 2017; Palu et al., 2019, 2020).  
341 In contrast, null mutants must be matched to a genetic control line (Chow et al., 2013; Swarup et  
342 al., 2013). Our results showed that while four candidate genes validated using both methods, 11  
343 other candidate genes validated using one method of gene disruption (**Figure 3A**). These results  
344 suggest the need for rigor in that multiple methods should be employed when applicable for  
345 testing host survival or validating gene candidate (Ayroles et al., 2015).

346 Two major connections between the validated fly genes in this study and mammalian  
347 systems is the role of immune cell regulation and sex-specific differences. The gene *CG13404*,  
348 which was identified in the female-only GWA, can explain both of these themes. Host mortality  
349 in *CG13404* RNAi-knockdown flies indicated they were significantly more susceptible to  
350 infection compared to control genotype. The human ortholog of *CG13404* is the plasminogen  
351 receptor (*PLG-R<sub>KT</sub>*), which is important for macrophage polarization and efferocytosis, two key  
352 components of inflammation regulation (Vago et al., 2019). The absence of *PLG-R<sub>KT</sub>* causes  
353 defective plasminogen binding and inflammatory macrophage migration in both male and female



354 mice pups, but only female *Plg-R<sub>KT</sub><sup>-/-</sup>* pups die two days after birth (Miles et al., 2017). We  
355 hypothesize that these sex-specific differences are conserved across species given that female  
356 flies knocked down for *CG13404* were more susceptible to *C. burnetii* infection.

357 In *D. melanogaster* immunity, hemocytes are the professional phagocytic cells given  
358 their ability to recognize, engulf, and destroy dying cells during development and pathogens  
359 during larval and adult stages (Hoffmann, 2003; Regan et al., 2013; Yano et al., 2008).  
360 Hemocytes also mediate the secretion of antimicrobial peptides (AMPs) in response to pathogen  
361 infection through the Toll, JAK/STAT, and Immune deficiency (Imd) pathways (Hoffmann,  
362 2003; Lemaitre and Hoffmann, 2007). Recent studies in our lab have shown that hemocytes  
363 support *C. burnetii* replication and induce Imd-specific AMPs (Bastos et al., 2017; Hiroyasu et  
364 al., 2018). Finally, hemocytes play important roles in melanization, encapsulation, and  
365 coagulation/clotting (Vlisidou and Wood, 2015). For example, embryonic hematopoiesis involves  
366 migration of progenitor blood cells and cytoskeleton rearrangement that requires integrins, Rho  
367 family GTPases, microtubule proteins, and actin/actin-binding proteins (Comber et al., 2013;  
368 Evans et al., 2010; Huelsmann, 2006; Paladi, 2004; Stramer et al., 2010; Zanet et al., 2009).  
369 While it remains undetermined how these individual processes occur during *C. burnetii*  
370 infection, our genetic screen identified genes that could be involved in haemocyte regulatory  
371 processes such as the *Rho guanyl-exchange factor (RhoGEF)* gene and two putative actin-  
372 binding proteins in the uncharacterized genes *CG34417* and *CG32264*. Future mechanistic  
373 studies are underway to determine the role of validated genes in the context of *C. burnetii*  
374 infection and will likely reveal more cross-species immune response conservation.

375 Additional connections to mammalian pathways can be extrapolated from the genes that  
376 validated in both null mutants and RNAi knockdowns, i.e. *DIP-ε*, *FER*, *tara*, and *CG42673*. The

377 human orthologs of *DIP-ε*, *FER*, *tara*, and *CG42673*, are *OPCML*, *FER*, *SERTADI*, and  
378 *NOSIAP*, respectively, based on highest weighted gene from the DRSC Integrative Ortholog  
379 Predictive Tool (DIOPT) score (Hu et al., 2011b). In flies, *tara* encodes a transcriptional co-  
380 regulator that interacts with chromatin remodeling complexes, cell cycle proteins, and the JNK  
381 signaling pathway and plays a role in ataxin-1-induced degeneration (Afonso et al., 2015; Branco  
382 et al., 2008; Calgaro et al., 2002; Fernandez-Funez et al., 2000). The ortholog *SERTADI* is also a  
383 transcriptional co-regulator and has been linked to molecular neural abnormalities similar to *tara*  
384 (Biswas et al., 2010; Savitz et al., 2013). Interestingly, a recent study showed that induction of  
385 *SERTADI* is IFN-independently expressed during Nipah virus infection (Glennon et al., 2015). It  
386 is known that IFN induction is tissue-dependent during *C. burnetii* infection (Hedges et al.,  
387 2016); therefore, it is plausible that *tara* is targeted during *C. burnetii* infection. We observed  
388 that the loss of *tara* lead to significantly decreased host survival during *C. burnetii* infection and  
389 future mechanistic studies on this gene may reveal novel host-pathogen interactions.

390 In flies, *DIP-ε* belongs to the immunoglobulin superfamily (IgSF) of *defective proboscis*  
391 *extension response* (Dpr) and *Dpr-interacting proteins* (DIP), which form a complex network of  
392 cell surface receptors in synaptic specificity. We observed that both null mutants and RNAi  
393 knockdown flies exhibited increased mortality to *C. burnetii* infection compared to their  
394 respective controls. We also noted that codon frequency fraction compared to wildtype is 0.27,  
395 which suggests that the SNP change results from decreased abundance of tRNA codon  
396 availability. How *DIP-ε* affects host survival at the cellular level remains unknown but for the  
397 SNP (2L\_6394872), it may be due to decreased codon availability altering proper gene  
398 expression that is ultimately important to the fly to fight infection. We hypothesize that *DIP-ε*  
399 may play a novel role during infection.

400 *FER*, which leads to activation of DPP and is a TGF- $\beta$  homolog, has recently been shown  
401 to improve survival of *Klebsiella pneumoniae* through *STAT3* when overexpressed (Dolgachev et  
402 al., 2018; Li et al., 2019; Murray, 2006). It is known that *C. burnetii* induces expression of  
403 *STAT3* and *IL-10* during murine infection (Millar et al., 2015; Murray, 2006; Textoris et al.,  
404 2010). One of these studies showed that male mice have increased gene expression of *STAT3* and  
405 *IL-10* during infection which may account for the higher susceptibility of Q fever observed in  
406 men (Textoris et al., 2010). Our study corroborates previously observed sex-specific differences  
407 in gene expression following *C. burnetii* infection given that *FER* was a top hit in the female-  
408 only GWA. We hypothesize that the absence of *FER* in females disrupts the immune response  
409 required to control infection and leads to significantly increased host mortality.

410 The last of our validating genes in both null mutants and RNAi knockdown is *CG42673*,  
411 an uncharacterized gene that was a top SNP (3L\_9540740) hit in the difference GWA. Another  
412 DGRP GWAS found that loss-of-function of *CG42673* in blood cells significantly impaired the  
413 cellular immune response to *Staphylococcus aureus* (Nazario-Toole, 2016). Interestingly, this  
414 study also found that *dpr10* significantly affected *S. aureus* phagosome maturation while our  
415 own top hit, *dpr6* (3L\_10044744\_SNP) validated in RNAi knockdown. *CG42673* may function  
416 as an enhancer like its human ortholog *NOSIAP* and is perhaps a target of *C. burnetii*  
417 pathogenesis. *NOSIAP* is known to bind neural nitric oxide synthase in the brain as well as  
418 proteins involved in the spliceosome and small nucleolar ribonucleic complexes according to  
419 mass-spectrometry protein-interaction studies (Grossmann et al., 2015; Hein et al., 2015).

420 Another theme of this study is the role of regulatory elements among validated genes.  
421 The eukaryotic gene expression process depends on proper splicing of precursor mRNA into  
422 mature mRNA which requires spliceosome recognition at specific RNA sequences at the exon-

423 intron boundaries (Singh and Cooper, 2012; Wang and Burge, 2008). Together with the 3' and 5'  
424 splice sites, the branch site helps bind small nuclear ribonucleic proteins for efficient exon  
425 recognition and branch point variants can result in exon skipping, aberrant splicing and altered  
426 production of transcripts that ultimately cause disease (Královičová et al., 2004; Will and  
427 Luhrmann, 2011). Similarly, the relative abundance of codons encoding each amino acid affects  
428 mRNA translation/stability and transcription ultimately determining gene expression levels  
429 (Jeacock et al., 2018; Komar, 2016; Sauna and Kimchi-Sarfaty, 2011; Zhou et al., 2016). We  
430 determined regulatory annotations for SNPs in genes that affected host survival using data  
431 available in ENCODE to reason how the mutations identified by the GWA can be affecting host  
432 survival, such as by affecting transcript abundance. We found that for several SNPs in validating  
433 genes differ in splicing, branch point variation, and codon abundance compared to wildtype  
434 sequences.

435 For example, the candidate gene *CG34351* was selected from female-only GWA and host  
436 mortality to *C. burnetii* infection was significantly different from genetic control in null mutants  
437 only (**Figure 3A, Table S5**). We found that the SNP (2L\_4702261) within this gene differs  
438 -34.14% from wildtype branch point splicing. This large negative percentage difference suggests  
439 that the branch point site is broken. The SNP in validated gene *DIP-ε* (2L\_6394872) showed a  
440 codon usage fraction of 3.72, higher than would be expected for an equal usage ratio of differing  
441 codons. We also found that the SNP (3L\_7623460) within *Pura* differs 7.74% from wildtype  
442 splice variation, which indicates a new splice site creation with no destruction. The SNP  
443 (3R\_12079260) within *tara* differs 64.82% from wildtype splicing which also indicates a new  
444 splice site creation with no destruction. For this *tara* SNP we interpret that the new acceptor site  
445 could end the intron at alternate site and could contribute to mortality of null mutants and RNAi

446 knockdown flies. The insertion (3R\_5218712) within *FER* differs -92.69% from wildtype  
447 splicing and has no variation in branch point splicing from wildtype. The -92.69% change in  
448 splicing for this *FER* SNP indicates the site is broken but the destruction is offset by a 3 base pair  
449 insertion. At the host level, *FER* null mutants and RNAi knockdowns differed from control  
450 genotypes, which may be partially explained by altered splicing. The SNP (X\_13210675) within  
451 *IP3K2* differs -17.01% from wildtype splicing and has no variation in branch point splicing from  
452 wildtype. The -17.01% splicing difference in this *IP3K2* SNP indicates the splice site is broken  
453 because there is destruction with no creation.

454         At the regulatory annotation level, a silent codon change (ttA/ttG) was found in the SNP  
455 for *shn* (2R\_7099616) (**Table 2**). However, in total, 10 unique SNPs were located within *shn*  
456 from the female-only GWA (**Table S4**), this gene validated in the null mutant but not by RNAi  
457 knockdown. Specifically, the *shn*<sup>1</sup> null mutant exhibited lower mortality during *C. burnetii*  
458 infection than the *y*<sup>1</sup> *w*<sup>67c23</sup> genetic control, which we defined as a tolerant phenotype (**Table S5**).  
459 The human ortholog of *shn* is *HIVEP2* (HIV enhancer binding protein 2) which also encodes a  
460 transcription factor that binds to NF-κB of different genes and contains a zinc finger C2H2  
461 transcription factor domain (Allen and Wu, 2005). Although no published studies have linked  
462 *HIVEP2* or *shn* to *C. burnetii* pathobiology, *shn* is part of the decapentaplegic (DPP) pathway,  
463 analogous to the human TGF-β pathway (36). Additionally, it has been shown that *C. burnetii*  
464 induces expression of TGF-β1 in during atypical macrophage maturation (Benoit et al., 2008b).  
465 There were no significant changes in splicing, branch point variation, or codon usage in the *shn*  
466 SNP compared to wildtype therefore we suspect this gene functions with others during *C.*  
467 *burnetii* infection or within a pathway not tested here. Overall, our results show that employing  
468 select bioinformatic tools allows us to browse integrative-level annotations on candidate and

469 validated host variants in this study. Taken together with the host survival of variants during *C.*  
470 *burnetii* infection, several hypothesis-driven questions can be posed about the immune function  
471 of the variants.

472 In addition to connections between validated fly genes and their mammalian orthologs,  
473 there were interesting observations between the DGRP predictive effect of top hits and validating  
474 genes. According to the GWAS data, the *RhoGEF64C* SNP (3L\_4738164) causes increased  
475 susceptibility (effect = -0.1709, **Table S5**). However, we observed that survival of  
476 *RhoGEF64C*<sup>MB04730</sup> null mutant males had significantly improved survival compared to control  
477 genotype (**Figure 3C**) but not in RNAi experiments (**Figure 3C'**). Therefore, an opposite  
478 survival trend in the null mutant flies would only be likely if the SNP was a gain-of-function  
479 mutation, which is difficult to test. Similarly, for the SNP (X\_14160126) in gene *CG13404*  
480 (effect = 0.1213) predicts less susceptibility but we observed that RNAi knockdown females  
481 were significantly more susceptible compared to control genotype (**Figure 3E'**), while null  
482 mutants had no difference in host survival during infection (**Figure 3E**). Gene product threshold  
483 effects are one possible explanation for these complex data on host survival, and overall  
484 susceptible or tolerant phenotype during infection must be tested at the host level with  
485 subsequent functional experiments must be conducted.

486 Our screen using the DGRP identified several gene variants that affected host survival  
487 during *C. burnetii* infection that taken together with their known function and human ortholog  
488 information, can drive new mechanism-driven questions. Importantly, this study builds on our  
489 previously developed framework utilizing the *D. melanogaster* as an animal model to dissect the  
490 innate immune response to *C. burnetii* infection (Bastos et al., 2017; Hiroyasu et al., 2018). We  
491 observed that for candidate and validated genes, regulatory element data helps explain how the

492 gene variants may affect host survival. In each case, identification of alternate transcripts in  
493 RNA-seq data would be supportive of the functional hypotheses suggested by our bioinformatic  
494 analyses. Follow up studies will need to go beyond whole organism mutants tested here, such as  
495 testing minigene mutants which allow researchers to test splicing patterns *in vitro* (Cooper, 2005;  
496 Ruan et al., 2015; Stoss et al., 1999). Nevertheless, the gene variants identified here highlight  
497 conserved cross-species connections and an opportunity for novel discovery about their role  
498 during *C. burnetii* infection.

499

500 **ACKNOWLEDGEMENTS**

501           We thank Marcos A. Perez for critical review of this manuscript. We thank Michael D.  
502 Knight, Sarah A. Borgnes, Olivia Hayden, Marina Martin, and Emily L. Kindelberger for  
503 assistance in injecting fruit flies. We thank Codie Durfee for technical assistance. We are  
504 thankful to the Drosophila Genomics Resource Center (P40OD010949), the Bloomington  
505 Drosophila Stock Center (P40OD018537), the Vienna Drosophila Stock Center, Exelixis and  
506 TRiP at Harvard Medical School (R01GM084947) for providing reagents and fly stocks. This  
507 investigation was supported by funds from Washington State University and the National  
508 Institutes of Health Public Health Service grant R21AI128103 (to A.G.G.). R.D.O. was  
509 supported by NIH Training Grant T32AI007025. This investigation's contents are solely the  
510 responsibility of the authors and do not necessarily represent the official views of the NIH.

511



512 **LITERATURE CITED**

- 513 Afonso, D.J.S., Liu, D., Machado, D.R., Pan, H., Jepson, J.E.C., Rogulja, D., Koh, K., 2015.  
514 TARANIS Functions with Cyclin A and Cdk1 in a Novel Arousal Center to Control  
515 Sleep in *Drosophila*. *Current Biology* 25, 1717–1726.  
516 <https://doi.org/10.1016/j.cub.2015.05.037>
- 517 Aguilera, M., Salinas, R., Rosales, E., Carminati, S., Colombo, M.I., Beron, W., 2009. Actin  
518 Dynamics and Rho GTPases Regulate the Size and Formation of Parasitophorous  
519 Vacuoles Containing *Coxiella burnetii*. *Infection and Immunity* 77, 4609–4620.  
520 <https://doi.org/10.1128/IAI.00301-09>
- 521 Allen, C.E., Wu, L.-C., 2005. ZAS Zinc Finger Proteins: The Other  $\kappa$ B-Binding Protein Family,  
522 in: Iuchi, S., Kuldell, N. (Eds.), *Zinc Finger Proteins, Molecular Biology Intelligence*  
523 Unit. Springer US, Boston, MA, pp. 213–220. [https://doi.org/10.1007/0-387-27421-9\\_29](https://doi.org/10.1007/0-387-27421-9_29)
- 524 Ammerdorffer, A., Stappers, M.H., Oosting, M., Schoffelen, T., Hagenaars, J.C., Bleeker-  
525 Rovers, C.P., Wegdam-Blans, M.C., Wever, P.C., Roest, H.J., van de Vosse, E., Netea,  
526 M.G., Sprong, T., Joosten, L.A., 2016. Genetic variation in TLR10 is not associated with  
527 chronic Q fever, despite the inhibitory effect of TLR10 on *Coxiella burnetii*-induced  
528 cytokines in vitro. *Cytokine* 77, 196–202. <https://doi.org/10.1016/j.cyto.2015.09.005>
- 529 Anderson, A., Bijlmer, H., Fournier, P.E., Graves, S., Hartzell, J., Kersh, G.J., Limonard, G.,  
530 Marrie, T.J., Massung, R.F., McQuiston, J.H., Nicholson, W.L., Paddock, C.D., Sexton,  
531 D.J., 2013. Diagnosis and management of Q fever--United States, 2013:  
532 recommendations from CDC and the Q Fever Working Group. *MMWR*.  
533 Recommendations and reports : Morbidity and mortality weekly report.  
534 Recommendations and reports 62, 1–30.

- 535 Ayroles, J.F., Buchanan, S.M., O’Leary, C., Skutt-Kakaria, K., Grenier, J.K., Clark, A.G., Hartl,  
536 D.L., de Bivort, B.L., 2015. Behavioral idiosyncrasy reveals genetic control of  
537 phenotypic variability. *Proc Natl Acad Sci USA* 112, 6706–6711.  
538 <https://doi.org/10.1073/pnas.1503830112>
- 539 Bastos, R.G., Howard, Z.P., Hiroyasu, A., Goodman, A.G., 2017. Host and Bacterial Factors  
540 Control Susceptibility of *Drosophila Melanogaster* to *Coxiella burnetii* Infection. *Infect.*  
541 *Immun.* 85. <https://doi.org/10.1128/IAI.00218-17>
- 542 Benoit, M., Barbarat, B., Bernard, A., Olive, D., Mege, J.-L., 2008a. *Coxiella burnetii*, the agent  
543 of Q fever, stimulates an atypical M2 activation program in human macrophages.  
544 *European Journal of Immunology* 38, 1065–1070. <https://doi.org/10.1002/eji.200738067>
- 545 Benoit, M., Ghigo, E., Capo, C., Raoult, D., Mege, J.-L., 2008c. The uptake of apoptotic cells  
546 drives *Coxiella burnetii* replication and macrophage polarization: a model for Q fever  
547 endocarditis. *PLoS Pathog* 4, e1000066–e1000066.  
548 <https://doi.org/10.1371/journal.ppat.1000066>
- 549 Bewley, K.R., 2013. Animal models of Q fever (*Coxiella burnetii*). *Comparative medicine* 63,  
550 469–76.
- 551 Biswas, S.C., Zhang, Y., Iyirhiaro, G., Willett, R.T., Rodriguez Gonzalez, Y., Cregan, S.P.,  
552 Slack, R.S., Park, D.S., Greene, L.A., 2010. *Sertad1* Plays an Essential Role in  
553 Developmental and Pathological Neuron Death. *Journal of Neuroscience* 30, 3973–3982.  
554 <https://doi.org/10.1523/JNEUROSCI.6421-09.2010>
- 555 Boettcher, M., McManus, M.T., 2015. Choosing the Right Tool for the Job: RNAi, TALEN, or  
556 CRISPR. *Molecular Cell* 58, 575–585. <https://doi.org/10.1016/j.molcel.2015.04.028>

- 557 Bou Sleiman, M.S., Osman, D., Massouras, A., Hoffmann, A.A., Lemaitre, B., Deplancke, B.,  
558 2015. Genetic, molecular and physiological basis of variation in *Drosophila* gut  
559 immunocompetence. *Nature communications* 6, 7829.  
560 <https://doi.org/10.1038/ncomms8829>
- 561 Branco, J., Al-Ramahi, I., Ukani, L., Pérez, A.M., Fernandez-Funez, P., Rincón-Limas, D.,  
562 Botas, J., 2008. Comparative analysis of genetic modifiers in *Drosophila* points to  
563 common and distinct mechanisms of pathogenesis among polyglutamine diseases.  
564 *Human Molecular Genetics* 17, 376–390. <https://doi.org/10.1093/hmg/ddm315>
- 565 Calgaro, S., Boube, M., Cribbs, D.L., Bourbon, H.-M., 2002. The *Drosophila* gene *taranis*  
566 encodes a novel trithorax group member potentially linked to the cell cycle regulatory  
567 apparatus. *Genetics* 160, 547–560.
- 568 Chow, C.Y., Wolfner, M.F., Clark, A.G., 2013. Using natural variation in *Drosophila* to discover  
569 previously unknown endoplasmic reticulum stress genes. *Proceedings of the National*  
570 *Academy of Sciences* 110, 9013–9018. <https://doi.org/10.1073/pnas.1307125110>
- 571 Coleman, S.A., Fischer, E.R., Howe, D., Mead, D.J., Heinzen, R.A., 2004. Temporal Analysis of  
572 *Coxiella burnetii* Morphological Differentiation. *Journal of Bacteriology* 186, 7344–  
573 7352. <https://doi.org/10.1128/JB.186.21.7344-7352.2004>
- 574 Comber, K., Huelsmann, S., Evans, I., Sanchez-Sanchez, B.J., Chalmers, A., Reuter, R., Wood,  
575 W., Martin-Bermudo, M.D., 2013. A dual role for the PS integrin myospheroid in  
576 mediating *Drosophila* embryonic macrophage migration. *Journal of Cell Science* 126,  
577 3475–3484. <https://doi.org/10.1242/jcs.129700>
- 578 Cooper, T.A., 2005. Use of minigene systems to dissect alternative splicing elements. *Methods*  
579 37, 331–340. <https://doi.org/10.1016/j.ymeth.2005.07.015>

- 580 Dahlgren, F.S., McQuiston, J.H., Massung, R.F., Anderson, A.D., 2015. Q fever in the United  
581 States: summary of case reports from two national surveillance systems, 2000-2012. The  
582 American journal of tropical medicine and hygiene 92, 247–55.  
583 <https://doi.org/10.4269/ajtmh.14-0503>
- 584 De Lange, M.M., Schimmer, B., Vellema, P., Hautvast, J.L., Schneeberger, P.M., Van  
585 Duijnhoven, Y.T., 2014. Coxiella burnetii seroprevalence and risk factors in sheep  
586 farmers and farm residents in The Netherlands. Epidemiology and infection 142, 1231–  
587 44. <https://doi.org/10.1017/s0950268813001726>
- 588 Delaby, A., Gorvel, L., Espinosa, L., Lepolard, C., Raoult, D., Ghigo, E., Capo, C., Mege, J.L.,  
589 2012. Defective monocyte dynamics in Q fever granuloma deficiency. The Journal of  
590 infectious diseases 205, 1086–94. <https://doi.org/10.1093/infdis/jis013>
- 591 Dolgachev, V., Panicker, S., Balijepalli, S., McCandless, L.K., Yin, Y., Swamy, S., Suresh,  
592 M.V., Delano, M.J., Hemmila, M.R., Raghavendran, K., Machado-Aranda, D., 2018.  
593 Electroporation-mediated delivery of FER gene enhances innate immune response and  
594 improves survival in a murine model of pneumonia. Gene Ther 25, 359–375.  
595 <https://doi.org/10.1038/s41434-018-0022-y>
- 596 Evans, I.R., Hu, N., Skaer, H., Wood, W., 2010. Interdependence of macrophage migration and  
597 ventral nerve cord development in Drosophila embryos. Development 137, 1625–1633.  
598 <https://doi.org/10.1242/dev.046797>
- 599 Faugaret, D., Ben Amara, A., Alingrin, J., Dumas, A., Delaby, A., Lepolard, C., Raoult, D.,  
600 Textoris, J., Mege, J.L., 2014. Granulomatous response to Coxiella burnetii, the agent of  
601 Q fever: the lessons from gene expression analysis. Frontiers in cellular and infection  
602 microbiology 4, 172. <https://doi.org/10.3389/fcimb.2014.00172>

- 603 Fernandez-Funez, P., Nino-Rosales, M.L., de Gouyon, B., She, W.-C., Luchak, J.M., Martinez,  
604 P., Turiegano, E., Benito, J., Capovilla, M., Skinner, P.J., McCall, A., Canal, I., Orr,  
605 H.T., Zoghbi, H.Y., Botas, J., 2000. Identification of genes that modify ataxin-1-induced  
606 neurodegeneration. *Nature* 408, 101–106. <https://doi.org/10.1038/35040584>
- 607 Gelbart, W.M., 1989. The decapentaplegic gene: a TGF-beta homologue controlling pattern  
608 formation in *Drosophila*. *Development* 107 Suppl, 65–74.
- 609 Ghigo, E., Capo, C., Tung, C.H., Raoult, D., Gorvel, J.P., Mege, J.L., 2002. *Coxiella burnetii*  
610 survival in THP-1 monocytes involves the impairment of phagosome maturation: IFN-  
611 gamma mediates its restoration and bacterial killing. *Journal of immunology (Baltimore,*  
612 *Md. : 1950)* 169, 4488–95.
- 613 Glennon, N.B., Jabado, O., Lo, M.K., Shaw, M.L., 2015. Transcriptome Profiling of the Virus-  
614 Induced Innate Immune Response in *Pteropus vampyrus* and Its Attenuation by Nipah  
615 Virus Interferon Antagonist Functions. *J. Virol.* 89, 7550–7566.  
616 <https://doi.org/10.1128/JVI.00302-15>
- 617 Gorvel, L., Textoris, J., Banchereau, R., Ben Amara, A., Tantibhedhyangkul, W., von Bargen,  
618 K., Ka, M.B., Capo, C., Ghigo, E., Gorvel, J.P., Mege, J.L., 2014. Intracellular bacteria  
619 interfere with dendritic cell functions: role of the type I interferon pathway. *PloS one* 9,  
620 e99420. <https://doi.org/10.1371/journal.pone.0099420>
- 621 Grossmann, A., Benlasfer, N., Birth, P., Hegele, A., Wachsmuth, F., Apelt, L., Stelzl, U., 2015.  
622 Phospho-tyrosine dependent protein–protein interaction network. *Mol Syst Biol* 11, 794.  
623 <https://doi.org/10.15252/msb.20145968>

- 624 Hedges, J.F., Robison, A., Kimmel, E., Christensen, K., Lucas, E., Ramstead, A., Jutila, M.A.,  
625 2016. Type I Interferon Counters or Promotes *Coxiella burnetii* Replication Dependent  
626 on Tissue. *Infect. Immun.* 84, 1815–1825. <https://doi.org/10.1128/IAI.01540-15>
- 627 Hein, M.Y., Hubner, N.C., Poser, I., Cox, J., Nagaraj, N., Toyoda, Y., Gak, I.A., Weisswange, I.,  
628 Mansfeld, J., Buchholz, F., Hyman, A.A., Mann, M., 2015. A Human Interactome in  
629 Three Quantitative Dimensions Organized by Stoichiometries and Abundances. *Cell* 163,  
630 712–723. <https://doi.org/10.1016/j.cell.2015.09.053>
- 631 Hiroyasu, A., DeWitt, D.C., Goodman, A.G., 2018. Extraction of Hemocytes from *Drosophila*  
632 *melanogaster* Larvae for Microbial Infection and Analysis. *JoVE* 57077.  
633 <https://doi.org/10.3791/57077>
- 634 Hoffmann, J.A., 2003. The immune response of *Drosophila*. *Nature* 426, 33–38.  
635 <https://doi.org/10.1038/nature02021>
- 636 Hu, Y., Flockhart, I., Vinayagam, A., Bergwitz, C., Berger, B., Perrimon, N., Mohr, S.E., 2011a.  
637 An integrative approach to ortholog prediction for disease-focused and other functional  
638 studies. *BMC bioinformatics* 12, 357. <https://doi.org/10.1186/1471-2105-12-357>
- 639 Huang, W., Massouras, A., Inoue, Y., Peiffer, J., Ramia, M., Tarone, A.M., Turlapati, L.,  
640 Zichner, T., Zhu, D., Lyman, R.F., Magwire, M.M., Blankenburg, K., Carbone, M.A.,  
641 Chang, K., Ellis, L.L., Fernandez, S., Han, Y., Highnam, G., Hjelman, C.E., Jack, J.R.,  
642 Javaid, M., Jayaseelan, J., Kalra, D., Lee, S., Lewis, L., Munidasa, M., Onger, F., Patel,  
643 S., Perales, L., Perez, A., Pu, L., Rollmann, S.M., Ruth, R., Saada, N., Warner, C.,  
644 Williams, A., Wu, Y.Q., Yamamoto, A., Zhang, Y., Zhu, Y., Anholt, R.R., Korb, J.O.,  
645 Mittelman, D., Muzny, D.M., Gibbs, R.A., Barbadilla, A., Johnston, J.S., Stone, E.A.,  
646 Richards, S., Deplancke, B., Mackay, T.F., 2014a. Natural variation in genome

647 architecture among 205 *Drosophila melanogaster* Genetic Reference Panel lines. *Genome*  
648 *research* 24, 1193–208. <https://doi.org/10.1101/gr.171546.113>

649 Huelsmann, S., 2006. The PDZ-GEF Dizzy regulates cell shape of migrating macrophages via  
650 Rap1 and integrins in the *Drosophila* embryo. *Development* 133, 2915–2924.  
651 <https://doi.org/10.1242/dev.02449>

652 Jeacock, L., Faria, J., Horn, D., 2018. Codon usage bias controls mRNA and protein abundance  
653 in trypanosomatids. *eLife* 7, e32496. <https://doi.org/10.7554/eLife.32496>

654 Ka, M.B., Gondois-Rey, F., Capo, C., Textoris, J., Million, M., Raoult, D., Olive, D., Mege, J.L.,  
655 2014. Imbalance of circulating monocyte subsets and PD-1 dysregulation in Q fever  
656 endocarditis: the role of IL-10 in PD-1 modulation. *PloS one* 9, e107533.  
657 <https://doi.org/10.1371/journal.pone.0107533>

658 Karakousis, P.C., Trucksis, M., Dumler, J.S., 2006. Chronic Q fever in the United States. *Journal*  
659 *of clinical microbiology* 44, 2283–7. <https://doi.org/10.1128/jcm.02365-05>

660 Kersh, G.J., Fitzpatrick, K.A., Self, J.S., Priestley, R.A., Kelly, A.J., Lash, R.R., Marsden-Haug,  
661 N., Nett, R.J., Bjork, A., Massung, R.F., Anderson, A.D., 2013. Presence and persistence  
662 of *Coxiella burnetii* in the environments of goat farms associated with a Q fever outbreak.  
663 *Applied and environmental microbiology* 79, 1697–703.  
664 <https://doi.org/10.1128/aem.03472-12>

665 Komar, A.A., 2016. The Yin and Yang of codon usage. *Human Molecular Genetics* 25, R77–  
666 R85. <https://doi.org/10.1093/hmg/ddw207>

667 Královičová, J., Houngrinou-Molango, S., Krämer, A., Vořechovský, I., 2004. Branch site  
668 haplotypes that control alternative splicing. *Human Molecular Genetics* 13, 3189–3202.  
669 <https://doi.org/10.1093/hmg/ddh334>

- 670 Lemaitre, B., Hoffmann, J., 2007. The Host Defense of *Drosophila melanogaster*. Annual  
671 Review of Immunology 25, 697–743.  
672 <https://doi.org/10.1146/annurev.immunol.25.022106.141615>
- 673 Leone, M., Honstetter, A., Lepidi, H., Capo, C., Bayard, F., Raoult, D., Mege, J.-L., 2004. Effect  
674 of Sex on *Coxiella burnetii* Infection: Protective Role of 17 $\beta$ -Estradiol. J Infect Dis 189,  
675 339–345. <https://doi.org/10.1086/380798>
- 676 Li, P., Ma, Z., Yu, Y., Hu, X., Zhou, Y., Song, H., 2019. FER promotes cell migration via  
677 regulating JNK activity. Cell Prolif 52. <https://doi.org/10.1111/cpr.12656>
- 678 Mackay, T.F., Richards, S., Stone, E.A., Barbadilla, A., Ayroles, J.F., Zhu, D., Casillas, S., Han,  
679 Y., Magwire, M.M., Cridland, J.M., Richardson, M.F., Anholt, R.R., Barron, M., Bess,  
680 C., Blankenburg, K.P., Carbone, M.A., Castellano, D., Chaboub, L., Duncan, L., Harris,  
681 Z., Javaid, M., Jayaseelan, J.C., Jhangiani, S.N., Jordan, K.W., Lara, F., Lawrence, F.,  
682 Lee, S.L., Librado, P., Linheiro, R.S., Lyman, R.F., Mackey, A.J., Munidasa, M., Muzny,  
683 D.M., Nazareth, L., Newsham, I., Perales, L., Pu, L.L., Qu, C., Ramia, M., Reid, J.G.,  
684 Rollmann, S.M., Rozas, J., Saada, N., Turlapati, L., Worley, K.C., Wu, Y.Q., Yamamoto,  
685 A., Zhu, Y., Bergman, C.M., Thornton, K.R., Mittelman, D., Gibbs, R.A., 2012a. The  
686 *Drosophila melanogaster* Genetic Reference Panel. Nature 482, 173–8.  
687 <https://doi.org/10.1038/nature10811>
- 688 Mackay, T.F.C., Huang, W., 2018. Charting the genotype-phenotype map: lessons from the  
689 *Drosophila melanogaster* Genetic Reference Panel: Charting the genotype-phenotype  
690 map. WIREs Dev Biol 7, e289. <https://doi.org/10.1002/wdev.289>
- 691 Madariaga, M.G., Rezai, K., Trenholme, G.M., Weinstein, R.A., 2003. Q fever: a biological  
692 weapon in your backyard. The Lancet. Infectious diseases 3, 709–21.



- 693 Marrie, T.J., Stein, A., Janigan, D., Raoult, D., 1996. Route of infection determines the clinical  
694 manifestations of acute Q fever. *The Journal of infectious diseases* 173, 484–7.
- 695 Maurin, M., Raoult, D., 1999. Q fever. *Clinical microbiology reviews* 12, 518–53.
- 696 McQuiston, J.H., Childs, J.E., Thompson, H.A., 2002. Q fever. *Journal of the American*  
697 *Veterinary Medical Association* 221, 796–9.
- 698 Meghari, S., Bechah, Y., Capo, C., Lepidi, H., Raoult, D., Murray, P.J., Mege, J.L., 2008.  
699 Persistent *Coxiella burnetii* infection in mice overexpressing IL-10: an efficient model for  
700 chronic Q fever pathogenesis. *PLoS pathogens* 4, e23.  
701 <https://doi.org/10.1371/journal.ppat.0040023>
- 702 Mehraj, V., Textoris, J., Ben Amara, A., Ghigo, E., Raoult, D., Capo, C., Mege, J.L., 2013.  
703 Monocyte responses in the context of Q fever: from a static polarized model to a kinetic  
704 model of activation. *The Journal of infectious diseases* 208, 942–51.  
705 <https://doi.org/10.1093/infdis/jit266>
- 706 Miles, L.A., Baik, N., Lighvani, S., Khaldoyanidi, S., Varki, N.M., Bai, H., Mueller, B.M.,  
707 Parmer, R.J., 2017. Deficiency of plasminogen receptor, Plg-R<sub>KT</sub>, causes defects in  
708 plasminogen binding and inflammatory macrophage recruitment *in vivo*. *J Thromb*  
709 *Haemost* 15, 155–162. <https://doi.org/10.1111/jth.13532>
- 710 Millar, J.A., Valdés, R., Kacharia, F.R., Landfear, S.M., Cambronne, E.D., Raghavan, R., 2015.  
711 *Coxiella burnetii* and *Leishmania mexicana* residing within similar parasitophorous  
712 vacuoles elicit disparate host responses. *Front. Microbiol.* 6.  
713 <https://doi.org/10.3389/fmicb.2015.00794>

- 714 Murray, M.J., 2006. The Fes/Fer non-receptor tyrosine kinase cooperates with Src42A to  
715 regulate dorsal closure in *Drosophila*. *Development* 133, 3063–3073.  
716 <https://doi.org/10.1242/dev.02467>
- 717 Nazario-Toole, A.E., 2016. Genome Wide Association Studies of Phagocytosis and the Cellular  
718 Immune Response in *Drosophila melanogaster*. Digital Repository at the University of  
719 Maryland. <https://doi.org/10.13016/M26V1H>
- 720 Omsland, A., Cockrell, D.C., Howe, D., Fischer, E.R., Virtaneva, K., Sturdevant, D.E., Porcella,  
721 S.F., Heinzen, R.A., 2009. Host cell-free growth of the Q fever bacterium *Coxiella*  
722 *burnetii*. *Proceedings of the National Academy of Sciences* 106, 4430–4434.  
723 <https://doi.org/10.1073/pnas.0812074106>
- 724 Paladi, M., 2004. Function of Rho GTPases in embryonic blood cell migration in *Drosophila*.  
725 *Journal of Cell Science* 117, 6313–6326. <https://doi.org/10.1242/jcs.01552>
- 726 Palu, R.A.S., Dalton, H.M., Chow, C.Y., 2020. Decoupling of Apoptosis from Activation of the  
727 ER Stress Response by the *Drosophila* Metallopeptidase *superdeath*. *Genetics* 214, 913–  
728 925. <https://doi.org/10.1534/genetics.119.303004>
- 729 Palu, R.A.S., Ong, E., Stevens, K., Chung, S., Owings, K.G., Goodman, A.G., Chow, C.Y.,  
730 2019. Natural Genetic Variation Screen in *Drosophila* Identifies Wnt Signaling,  
731 Mitochondrial Metabolism, and Redox Homeostasis Genes as Modifiers of Apoptosis.  
732 *G3* 9, 3995–4005. <https://doi.org/10.1534/g3.119.400722>
- 733 Pennings, J.L.A., Kremers, M.N.T., Hodemaekers, H.M., Hagenaaars, J.C.J.P., Koning, O.H.J.,  
734 Renders, N.H.M., Hermans, M.H.A., de Klerk, A., Notermans, D.W., Wever, P.C.,  
735 Janssen, R., 2015. Dysregulation of serum gamma interferon levels in vascular chronic Q

- 736 Fever patients provides insights into disease pathogenesis. *Clin Vaccine Immunol* 22,  
737 664–671. <https://doi.org/10.1128/CVI.00078-15>
- 738 Raoult, D., Marrie, T., Mege, J., 2005. Natural history and pathophysiology of Q fever. *The*  
739 *Lancet. Infectious diseases* 5, 219–26. [https://doi.org/10.1016/s1473-3099\(05\)70052-9](https://doi.org/10.1016/s1473-3099(05)70052-9)
- 740 Regan, J.C., Brandão, A.S., Leitão, A.B., Mantas Dias, Â.R., Sucena, É., Jacinto, A., Zaidman-  
741 Rémy, A., 2013. Steroid Hormone Signaling Is Essential to Regulate Innate Immune  
742 Cells and Fight Bacterial Infection in *Drosophila*. *PLoS Pathog* 9, e1003720.  
743 <https://doi.org/10.1371/journal.ppat.1003720>
- 744 Roest, H.I., Bossers, A., van Zijderveld, F.G., Rebel, J.M., 2013. Clinical microbiology of  
745 *Coxiella burnetii* and relevant aspects for the diagnosis and control of the zoonotic  
746 disease Q fever. *The Veterinary quarterly* 33, 148–60.  
747 <https://doi.org/10.1080/01652176.2013.843809>
- 748 Roest, H.I., Ruuls, R.C., Tilburg, J.J., Nabuurs-Franssen, M.H., Klaassen, C.H., Vellema, P., van  
749 den Brom, R., Dercksen, D., Wouda, W., Spierenburg, M.A., van der Spek, A.N., Buijs,  
750 R., de Boer, A.G., Willemsen, P.T., van Zijderveld, F.G., 2011a. Molecular epidemiology  
751 of *Coxiella burnetii* from ruminants in Q fever outbreak, the Netherlands. *Emerging*  
752 *infectious diseases* 17, 668–75. <https://doi.org/10.3201/eid1704.101562>
- 753 Roest, H.I., Tilburg, J.J., van der Hoek, W., Vellema, P., van Zijderveld, F.G., Klaassen, C.H.,  
754 Raoult, D., 2011b. The Q fever epidemic in The Netherlands: history, onset, response and  
755 reflection. *Epidemiology and infection* 139, 1–12.  
756 <https://doi.org/10.1017/s0950268810002268>

- 757 Roest, H.J., van Gelderen, B., Dinkla, A., Frangoulidis, D., van Zijderveld, F., Rebel, J., van  
758 Keulen, L., 2012. Q fever in pregnant goats: pathogenesis and excretion of *Coxiella*  
759 *burnetii*. *PloS one* 7, e48949. <https://doi.org/10.1371/journal.pone.0048949>
- 760 Ruan, K., Zhu, Y., Li, C., Brazill, J.M., Zhai, R.G., 2015. Alternative splicing of *Drosophila*  
761 *Nmnat* functions as a switch to enhance neuroprotection under stress. *Nat Commun* 6,  
762 10057. <https://doi.org/10.1038/ncomms10057>
- 763 Salinas, R.P., Ortiz Flores, R.M., Distel, J.S., Aguilera, M.O., Colombo, M.I., Berón, W., 2015.  
764 *Coxiella burnetii* Phagocytosis Is Regulated by GTPases of the Rho Family and the RhoA  
765 Effectors mDia1 and ROCK. *PLoS One* 10, e0145211–e0145211.  
766 <https://doi.org/10.1371/journal.pone.0145211>
- 767 Sauna, Z.E., Kimchi-Sarfaty, C., 2011. Understanding the contribution of synonymous mutations  
768 to human disease. *Nat Rev Genet* 12, 683–691. <https://doi.org/10.1038/nrg3051>
- 769 Savitz, J., Frank, M.B., Victor, T., Bebak, M., Marino, J.H., Bellgowan, P.S.F., McKinney, B.A.,  
770 Bodurka, J., Kent Teague, T., Drevets, W.C., 2013. Inflammation and neurological  
771 disease-related genes are differentially expressed in depressed patients with mood  
772 disorders and correlate with morphometric and functional imaging abnormalities. *Brain*,  
773 *Behavior, and Immunity* 31, 161–171. <https://doi.org/10.1016/j.bbi.2012.10.007>
- 774 Schimmer, B., Morroy, G., Dijkstra, F., Schneeberger, P.M., Weers-Pothoff, G., Timen, A.,  
775 Wijkmans, C., van der Hoek, W., 2008. Large ongoing Q fever outbreak in the south of  
776 The Netherlands, 2008. *Euro surveillance : bulletin Europeen sur les maladies*  
777 *transmissibles = European communicable disease bulletin* 13.
- 778 Schoffelen, T., Ammerdorffer, A., Hagens, J.C., Bleeker-Rovers, C.P., Wegdam-Blans, M.C.,  
779 Wever, P.C., Joosten, L.A., van der Meer, J.W., Sprong, T., Netea, M.G., van Deuren,

- 780 M., van de Vosse, E., 2015. Genetic Variation in Pattern Recognition Receptors and  
781 Adaptor Proteins Associated With Development of Chronic Q Fever. *The Journal of*  
782 *infectious diseases* 212, 818–29. <https://doi.org/10.1093/infdis/jiv113>
- 783 Singh, R.K., Cooper, T.A., 2012. Pre-mRNA splicing in disease and therapeutics. *Trends in*  
784 *Molecular Medicine* 18, 472–482. <https://doi.org/10.1016/j.molmed.2012.06.006>
- 785 Sondgeroth, K.S., Davis, M.A., Schlee, S.L., Allen, A.J., Evermann, J.F., McElwain, T.F.,  
786 Baszler, T.V., 2013. Seroprevalence of *Coxiella burnetii* in Washington State domestic  
787 goat herds. *Vector borne and zoonotic diseases (Larchmont, N.Y.)* 13, 779–83.  
788 <https://doi.org/10.1089/vbz.2013.1331>
- 789 Stoss, O., Stoilov, P., Hartmann, A.M., Nayler, O., Stamm, S., 1999. The in vivo minigene  
790 approach to analyze tissue-specific splicing. *Brain Research Protocols* 4, 383–394.  
791 [https://doi.org/10.1016/S1385-299X\(99\)00043-4](https://doi.org/10.1016/S1385-299X(99)00043-4)
- 792 Stramer, B., Moreira, S., Millard, T., Evans, I., Huang, C.-Y., Sabet, O., Milner, M., Dunn, G.,  
793 Martin, P., Wood, W., 2010. Clasp-mediated microtubule bundling regulates persistent  
794 motility and contact repulsion in *Drosophila* macrophages in vivo. *Journal of Cell*  
795 *Biology* 189, 681–689. <https://doi.org/10.1083/jcb.200912134>
- 796 Swarup, S., Huang, W., Mackay, T.F.C., Anholt, R.R.H., 2013. Analysis of natural variation  
797 reveals neurogenetic networks for *Drosophila* olfactory behavior. *Proceedings of the*  
798 *National Academy of Sciences* 110, 1017–1022.  
799 <https://doi.org/10.1073/pnas.1220168110>
- 800 Textoris, J., Ban, L.H., Capo, C., Raoult, D., Leone, M., Mege, J.-L., 2010. Sex-Related  
801 Differences in Gene Expression Following *Coxiella burnetii* Infection in Mice: Potential

802 Role of Circadian Rhythm. PLoS ONE 5, e12190.  
803 <https://doi.org/10.1371/journal.pone.0012190>  
804 Vago, J.P., Sugimoto, M.A., Lima, K.M., Negreiros-Lima, G.L., Baik, N., Teixeira, M.M.,  
805 Perretti, M., Parmer, R.J., Miles, L.A., Sousa, L.P., 2019. Plasminogen and the  
806 Plasminogen Receptor, Plg-RKT, Regulate Macrophage Phenotypic, and Functional  
807 Changes. Front. Immunol. 10, 1458. <https://doi.org/10.3389/fimmu.2019.01458>  
808 van Asseldonk, M.A., Prins, J., Bergevoet, R.H., 2013. Economic assessment of Q fever in the  
809 Netherlands. Preventive veterinary medicine 112, 27–34.  
810 <https://doi.org/10.1016/j.prevetmed.2013.06.002>  
811 Vlisidou, I., Wood, W., 2015. *Drosophila* blood cells and their role in immune responses. FEBS  
812 J 282, 1368–1382. <https://doi.org/10.1111/febs.13235>  
813 Wang, J.B., Lu, H.-L., St Leger, R.J., 2017. The genetic basis for variation in resistance to  
814 infection in the *Drosophila melanogaster* genetic reference panel. PLoS Pathog 13,  
815 e1006260–e1006260. <https://doi.org/10.1371/journal.ppat.1006260>  
816 Wang, Z., Burge, C.B., 2008. Splicing regulation: From a parts list of regulatory elements to an  
817 integrated splicing code. RNA 14, 802–813. <https://doi.org/10.1261/rna.876308>  
818 Weber, M.M., Faris, R., van Schaik, E.J., McLachlan, J.T., Wright, W.U., Tellez, A., Roman,  
819 V.A., Rowin, K., Case, E.D.R., Luo, Z.-Q., Samuel, J.E., 2016. The Type IV Secretion  
820 System Effector Protein CirA Stimulates the GTPase Activity of RhoA and Is Required  
821 for Virulence in a Mouse Model of *Coxiella burnetii* Infection. Infect Immun 84, 2524–  
822 2533. <https://doi.org/10.1128/IAI.01554-15>  
823 Wielders, C.C., Hackert, V.H., Schimmer, B., Hodemaekers, H.M., de Klerk, A., Hoebe, C.J.,  
824 Schneeberger, P.M., van Duynhoven, Y.T., Janssen, R., 2015. Single nucleotide

825 polymorphisms in immune response genes in acute Q fever cases with differences in self-  
826 reported symptoms. *European journal of clinical microbiology & infectious diseases* :  
827 official publication of the European Society of Clinical Microbiology 34, 943–50.  
828 <https://doi.org/10.1007/s10096-014-2310-9>

829 Will, C.L., Luhrmann, R., 2011. Spliceosome Structure and Function. Cold Spring Harbor  
830 Perspectives in Biology 3, a003707–a003707.  
831 <https://doi.org/10.1101/cshperspect.a003707>

832 Yano, T., Mita, S., Ohmori, H., Oshima, Y., Fujimoto, Y., Ueda, R., Takada, H., Goldman, W.E.,  
833 Fukase, K., Silverman, N., Yoshimori, T., Kurata, S., 2008. Autophagic control of listeria  
834 through intracellular innate immune recognition in drosophila. *Nat Immunol* 9, 908–916.  
835 <https://doi.org/10.1038/ni.1634>

836 Zanet, J., Payre, F., Plaza, S., 2009. Fascin for cell migration in Drosophila. *Fly* 3, 281–282.  
837 <https://doi.org/10.4161/fly.10315>

838 Zhou, Z., Dang, Y., Zhou, M., Li, L., Yu, C., Fu, J., Chen, S., Liu, Y., 2016. Codon usage is an  
839 important determinant of gene expression levels largely through its effects on  
840 transcription. *Proc Natl Acad Sci USA* 113, E6117–E6125.  
841 <https://doi.org/10.1073/pnas.1606724113>

842 Zimmer, A.M., Pan, Y.K., Chandrapalan, T., Kwong, R.W.M., Perry, S.F., 2019. Loss-of-  
843 function approaches in comparative physiology: is there a future for knockdown  
844 experiments in the era of genome editing? *J Exp Biol* 222, jeb175737.  
845 <https://doi.org/10.1242/jeb.175737>

846

847

848 **FIGURE LEGENDS**

849 **Figure 1. Experimental design schematic.** Groups of 40 males and females per DGRP line  
850 were injected with PBS or *C. burnetii* at  $10^5$  bacteria/fly and host survival monitored for 30 days  
851 to obtain hazard ratios. The hazard ratios of all DGRP lines were log-transformed and used as  
852 input for a GWAS.

853  
854 **Figure 2. Genome-wide association analyses with hazard ratios reveal candidate genes.**  
855 Manhattan plots for A) male, B) female, C) average, and D) difference GWA analyses using  
856 mixed effect P-values for all four traits from dgrp2 webtool. Highlighted SNPs with P-values  
857 below  $10^{-5}$  are labeled with associated candidate genes.

858  
859 **Figure 3. Fifteen GWAS candidate genes are validated using survival rate as a metric.** (A)  
860 Venn diagram summarizes the genes that validate in null mutant flies, RNAi knockdown flies, or  
861 both. A gene is validated if the P value for its survival curve (mock versus infected) changes  
862 between the control and experimental line. P value threshold were not significant (n.s.),  $P < 0.01$ ,  
863 and  $p < 0.0001$ . Colors indicate the type of GWAS analysis from which the gene came. (B-B')  
864 Survival curves of control  $w^{1118}$  (B) females and (B') males following mock or *C. burnetii*  
865 infection. (C-E) Survival curves of *RhoGEF64C*<sup>KG02832</sup> (C) or control and *RhoGEF64C* RNAi  
866 males (C'), *tara*<sup>1</sup> (D) or control and *tara* RNAi females (D'), or *CG13404*<sup>f07827a</sup> (E) or *CG13404*  
867 RNAi females (E') following mock or *C. burnetii* infection. Each survival curve represents two  
868 independent experiments of at least 40 flies that were combined for a final survival curve,  
869 Statistical significance (Log-rank test) from the mock-infected group is indicated.

870



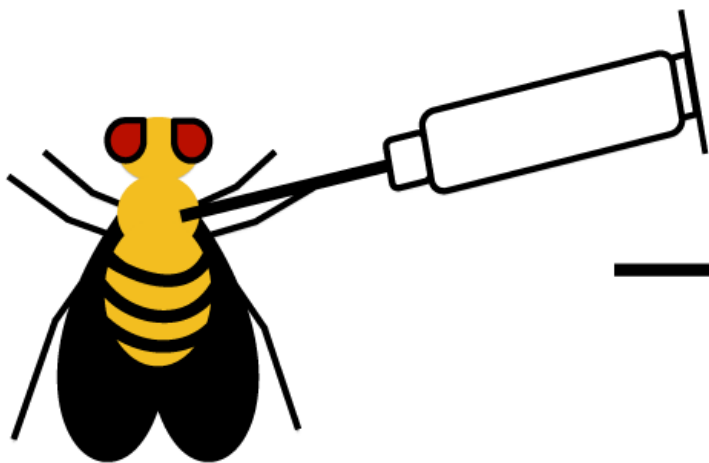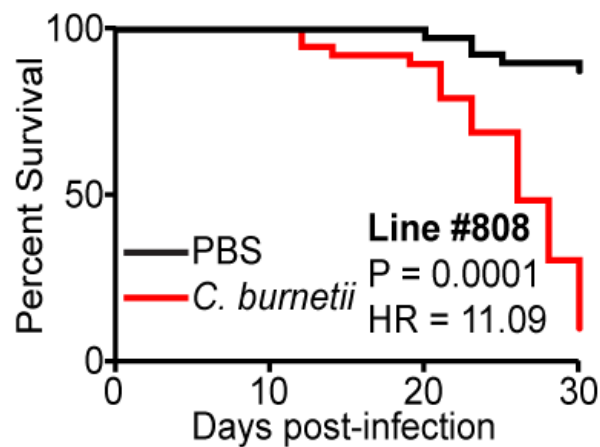

1. Infect DGRP lines with *C. burnetii* NMII

2. Record survival for 30 days and calculate hazard ratios for all lines

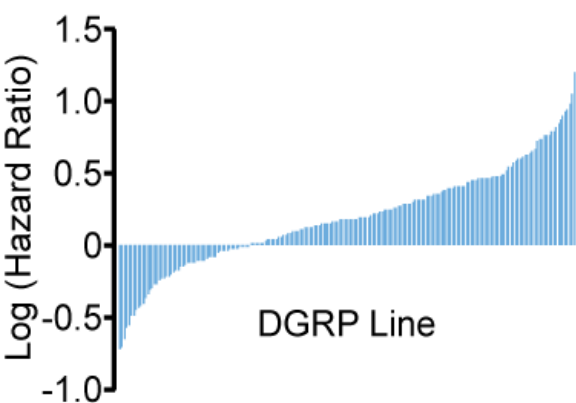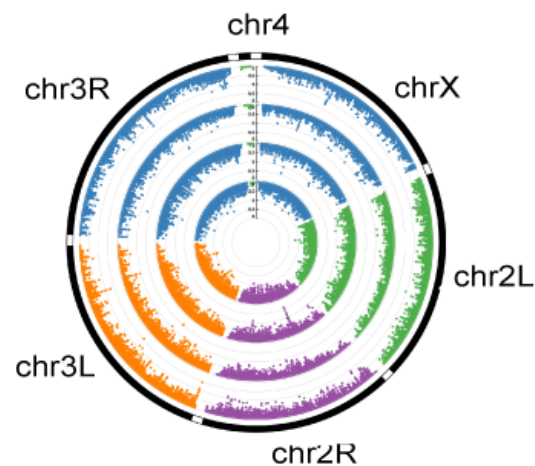

3. Submit hazard ratios to DGRP pipeline

4. Determine candidate genes using a GWAS

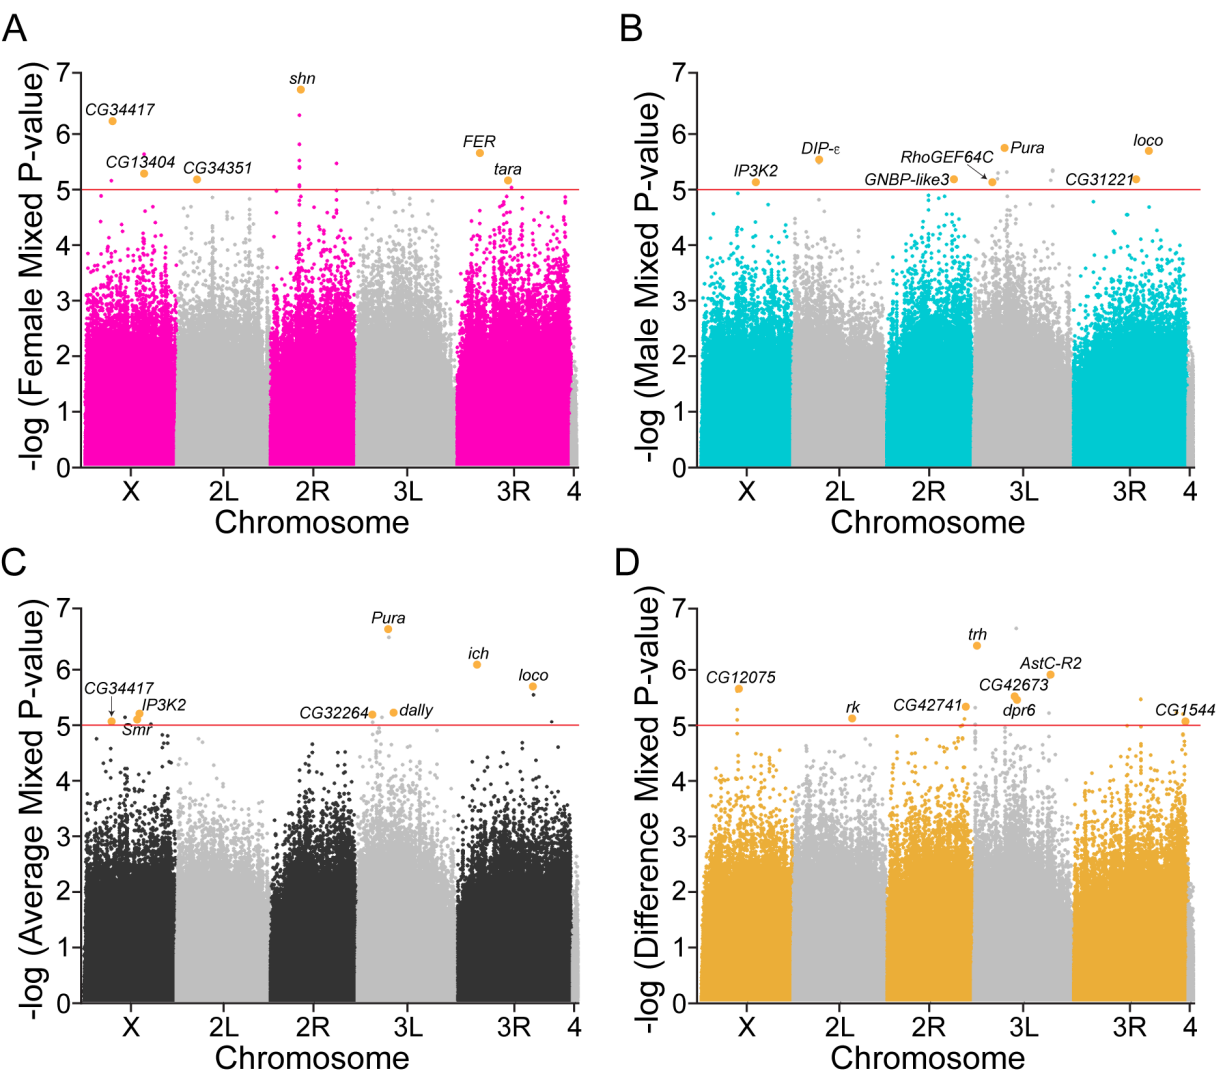

**A**

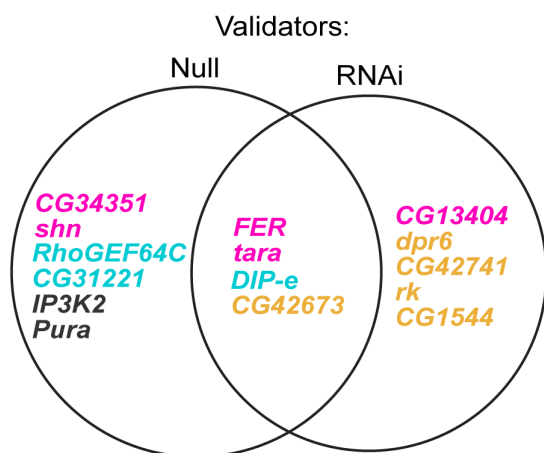

Non-validators:

GNBP-like3  
CG34417  
Smr  
CG32264  
dally  
ich  
loco  
CG12075  
trh  
AstC-R2

■ female candidates    ■ male candidates  
■ average candidates    ■ difference candidates

**B**

*w<sup>1118</sup>* - females

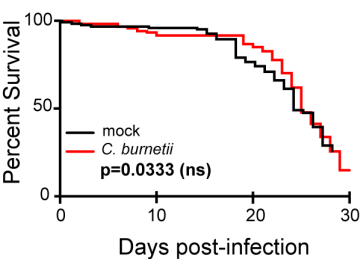

**B'**

*w<sup>1118</sup>* - males

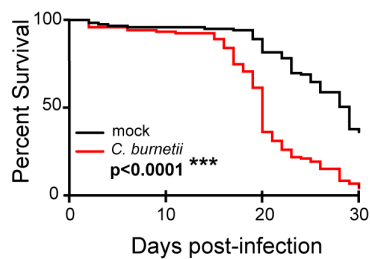

**C**

*RhoGEF64C<sup>MB04730</sup>* - males

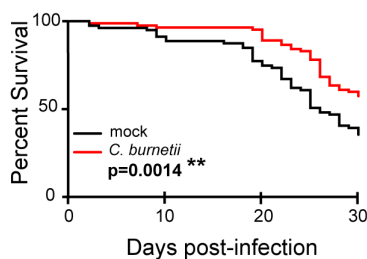

**C'**

*RhoGEF* RNAi - males

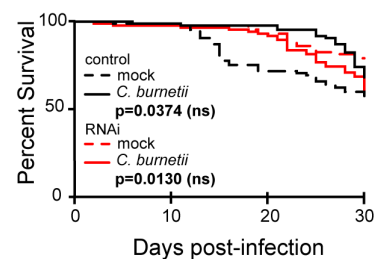

**D**

*tara<sup>1</sup>* - females

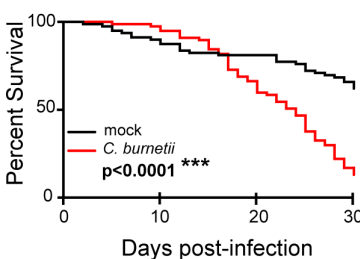

**D'**

*tara* RNAi - females

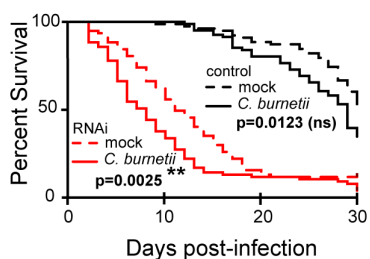

**E**

*CG13404<sup>f07827b</sup>* - females

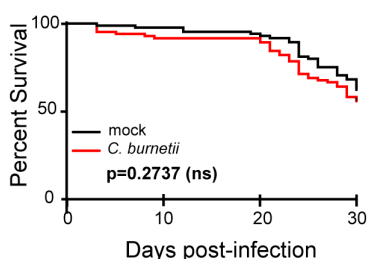

**E'**

*CG13404* RNAi - females

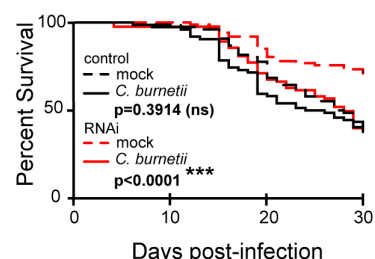

Table 1. Candidate genes associated with top SNPs from GWA analyses.

| Candidate Gene    | Top SNP (BDGP R5/dm3) | P-value              | Analysis   | Regulatory Annotations                                                   | Putative Gene Function                        | Human Ortholog* |
|-------------------|-----------------------|----------------------|------------|--------------------------------------------------------------------------|-----------------------------------------------|-----------------|
| <i>CG34351</i>    | 2L_4702261_SNP        | 7.5x10 <sup>-6</sup> | Female     | Poorly annotated<br>Euchromatin transcriptionally silent (or intergenic) | Regulation of G-proteins                      | RGS7BP          |
| <i>DIP-ε</i>      | 2L_6394872_SNP        | 2.9x10 <sup>-6</sup> | Male       | Euchromatin transcriptionally silent or dynamic                          | Interaction with Dprs                         | OPCML           |
| <i>rk</i>         | 2L_13999491_SNP       | 8.4x10 <sup>-6</sup> | Difference | Transcriptionally silent                                                 | GPCR; buriscon receptor; melanization         | LGR5            |
| <i>shn</i>        | 2R_7099616_SNP        | 1.9x10 <sup>-7</sup> | Female     | TFBS hot spot                                                            | Zinc finger C2H2 transcription factor         | HIVEP2          |
| <i>GNBP-like3</i> | 2R_16414194_SNP       | 6.1x10 <sup>-6</sup> | Male       | Euchromatin transcriptionally silent or dynamic                          | Beta 1,3-glucan recognition/binding           | CRYBG1          |
| <i>CG42741</i>    | 2R_18904195_SNP       | 5.3x10 <sup>-6</sup> | Difference | Transcriptionally silent                                                 | Zinc finger C2H2 transcription factor         | KLF3            |
| <i>trh</i>        | 3L_376337_SNP         | 4.4x10 <sup>-7</sup> | Difference | TFBS                                                                     | bHLH-PAS transcription factor                 | NPAS1           |
| <i>CG32264</i>    | 3L_3750617_SNP        | 7.5x10 <sup>-6</sup> | Average    | Transcriptionally silent                                                 | Actin binding                                 | PHACTR2         |
| <i>RhoGEF64C</i>  | 3L_4738164_SNP        | 7.4x10 <sup>-6</sup> | Male       | Euchromatin transcriptionally silent or dynamic                          | Rho guanyl-nucleotide exchange factor         | ARHGEF3         |
| <i>Pura</i>       | 3L_7623383_SNP        | 2.2x10 <sup>-7</sup> | Average    | lncRNA                                                                   | Rho guanyl-nucleotide exchange factor         | PLEKHG4         |
| <i>dally</i>      | 3L_8851042_SNP        | 6.7x10 <sup>-6</sup> | Average    | Putative enhancer but not hot spot                                       | Co-receptor for growth factors/morphogens     | GPC5            |
| <i>CG42673</i>    | 3L_9540740_SNP        | 3.5x10 <sup>-6</sup> | Difference | TFBS                                                                     | Nitric-oxide synthase binding                 | NOS1AP          |
| <i>dpr6</i>       | 3L_10044744_SNP       | 3.8x10 <sup>-6</sup> | Difference | Transcriptionally silent                                                 | Interaction with DIPs                         | CADM1           |
| <i>AstC-R2</i>    | 3L_18481371_SNP       | 1.4x10 <sup>-6</sup> | Difference | Between two TFBS                                                         | Allatostatin receptor                         | SSTR2           |
| <i>ich</i>        | 3R_4787301_SNP        | 9.3x10 <sup>-7</sup> | Average    | TFBS hot spot                                                            | Zinc finger C2H2 transcription factor         | PRDM15          |
| <i>FER</i>        | 3R_5218712_INS        | 2.7x10 <sup>-6</sup> | Female     | Active enhancer                                                          | Protein tyrosine kinase activity              | FER             |
| <i>tara</i>       | 3R_12079260_SNP       | 7.7x10 <sup>-6</sup> | Female     | Active enhancer, TFBS hot spot                                           | Transcriptional co-regulator                  | SERTAD1         |
| <i>CG31221</i>    | 3R_15278653_SNP       | 6.4x10 <sup>-6</sup> | Male       | Near TFBS                                                                | LDL receptor                                  | LRP1B           |
| <i>loco</i>       | 3R_18456211_SNP       | 2.3x10 <sup>-6</sup> | Average    | Antisense RNA, enhancer, TFBS                                            | Regulation of G-proteins                      | RGS12           |
| <i>CG1544</i>     | 3R_27026419_SNP       | 9.4x10 <sup>-6</sup> | Difference | TFBS                                                                     | Oxoglutarate dehydrogenase                    | DHTKD1          |
| <i>CG34417</i>    | X_6434578_SNP         | 9.9x10 <sup>-6</sup> | Average    | TFBS hot spot, putative enhancer/promoter                                | Actin binding                                 | SMTN            |
| <i>CG12075</i>    | X_8751630_SNP         | 2.7x10 <sup>-6</sup> | Difference | Silent chromatin state                                                   | Lipid signaling                               | -               |
| <i>Smr</i>        | X_12610055_SNP        | 8.9x10 <sup>-6</sup> | Average    | TFBS hot spot                                                            | Chromatin binding; transcriptional regulation | NCOR1           |
| <i>IP3K2</i>      | X_13210675_SNP        | 7.0x10 <sup>-6</sup> | Average    | Putative enhancer site                                                   | Calcium regulation; IP3 signaling             | NET1            |
| <i>CG13404</i>    | X_14160126_SNP        | 6.1x10 <sup>-6</sup> | Female     | Active enhancer, TFBS hot spot                                           | Plasminogen receptor (KT)                     | PLGKRT          |

\*human orthologs from DIOPT. Ortholog with highest weighted score reported.

Table 2. Splice, branch point, and codon usage analysis of validating genes.

| Candidate gene | Top SNP (BDGP R5/dm3) | Splice Variation From Wildtype | Branch Point Variation From Wildtype | Codon change     | Codon Usage Fraction (wildtype/SNP)* |
|----------------|-----------------------|--------------------------------|--------------------------------------|------------------|--------------------------------------|
| <i>CG34351</i> | 2L_4702261_SNP        | No difference                  | -34.14%                              | -                | -                                    |
| <i>DIP-ε</i>   | 2L_6394872_SNP        | N/A                            | N/A                                  | Ctg/Ttg (silent) | 3.72                                 |
| <i>shn</i>     | 2R_7099616_SNP        | N/A                            | N/A                                  | ttA/ttG (silent) | 1.1                                  |
| <i>Pura</i>    | 3L_7623460_SNP        | 7.74%                          | No difference                        | -                | -                                    |
| <i>tara</i>    | 3R_12079260_SNP       | 64.82%                         | N/A                                  | -                | -                                    |
| <i>FER</i>     | 3R_5218712_INS        | -92.69%                        | No difference                        | -                | -                                    |
| <i>IP3K2</i>   | X_13210675_SNP        | -17.01%                        | No difference                        | -                | -                                    |
| <i>CG13404</i> | X_14160126_SNP        | N/A                            | N/A                                  | ctC/ctT (silent) | 0.86                                 |

\*Frequency of amino acid per thousand
